# Supplementary material
Source: PubMed Central journal article supplement (PMC329229)

Figure i

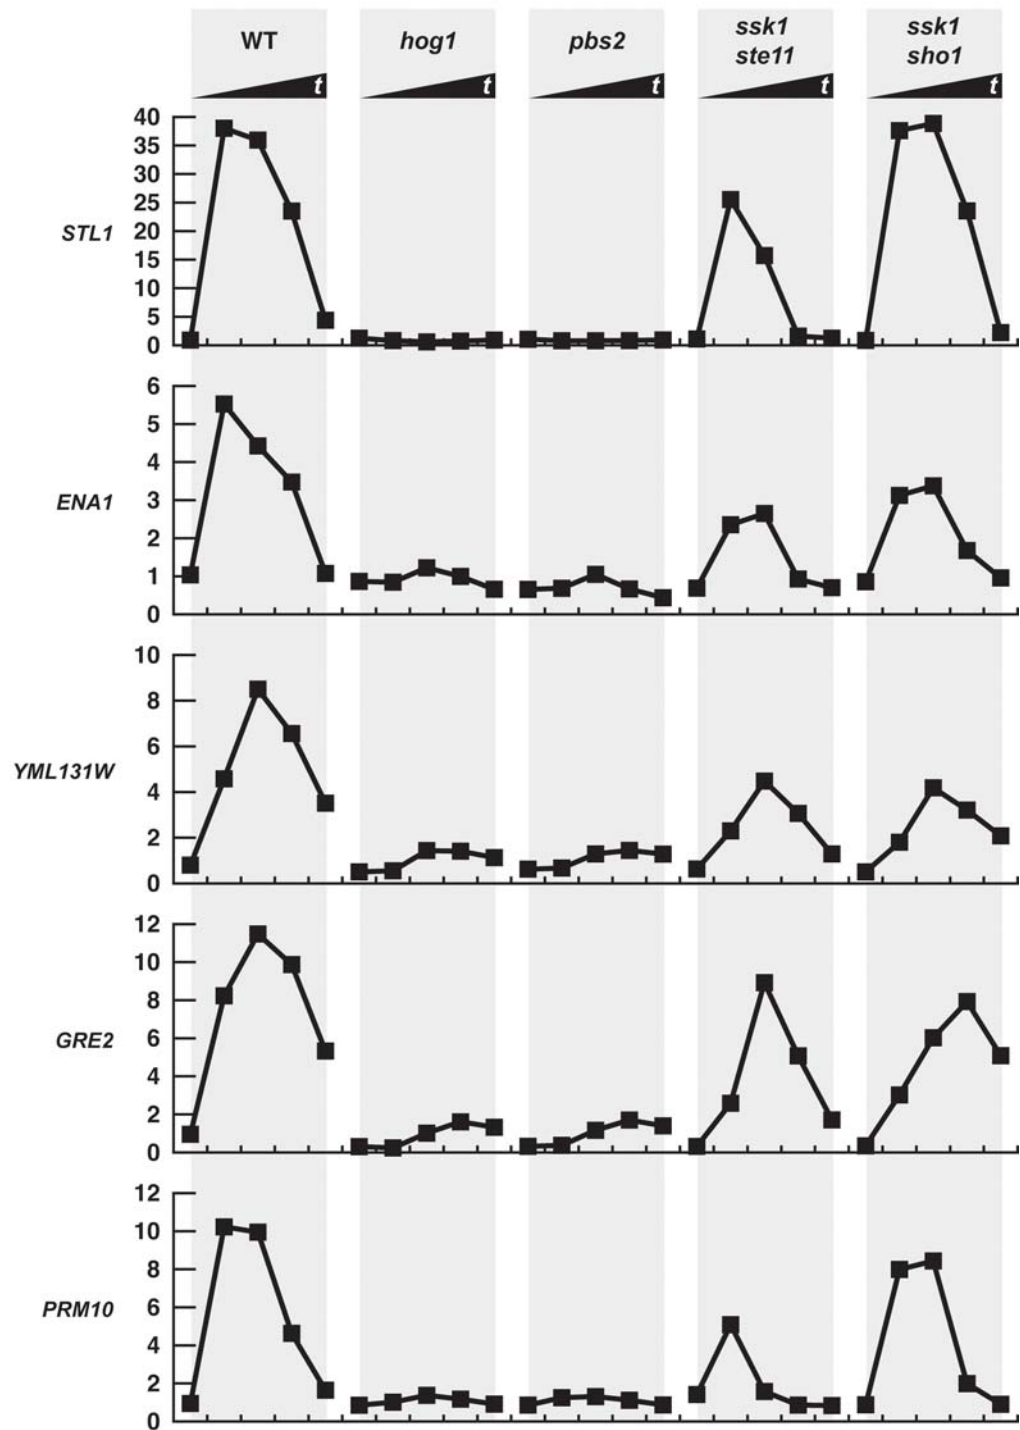

Supplement: mbc_15_2_532__1.pdf [file mbc_15_2_532__1.pdf]
